# Supplementary material for: Randomized Trial of a Mobile Personal Health Record for Behavioral Health Homes
Source: Atypon-hosted journal article supplement (doi:10.1176/appi.ps.201900381), 2020-05-04
Supplement: appi.ps.201900381.ds001.pdf [file appi.ps.201900381.ds001.pdf]

**Consort Diagram**

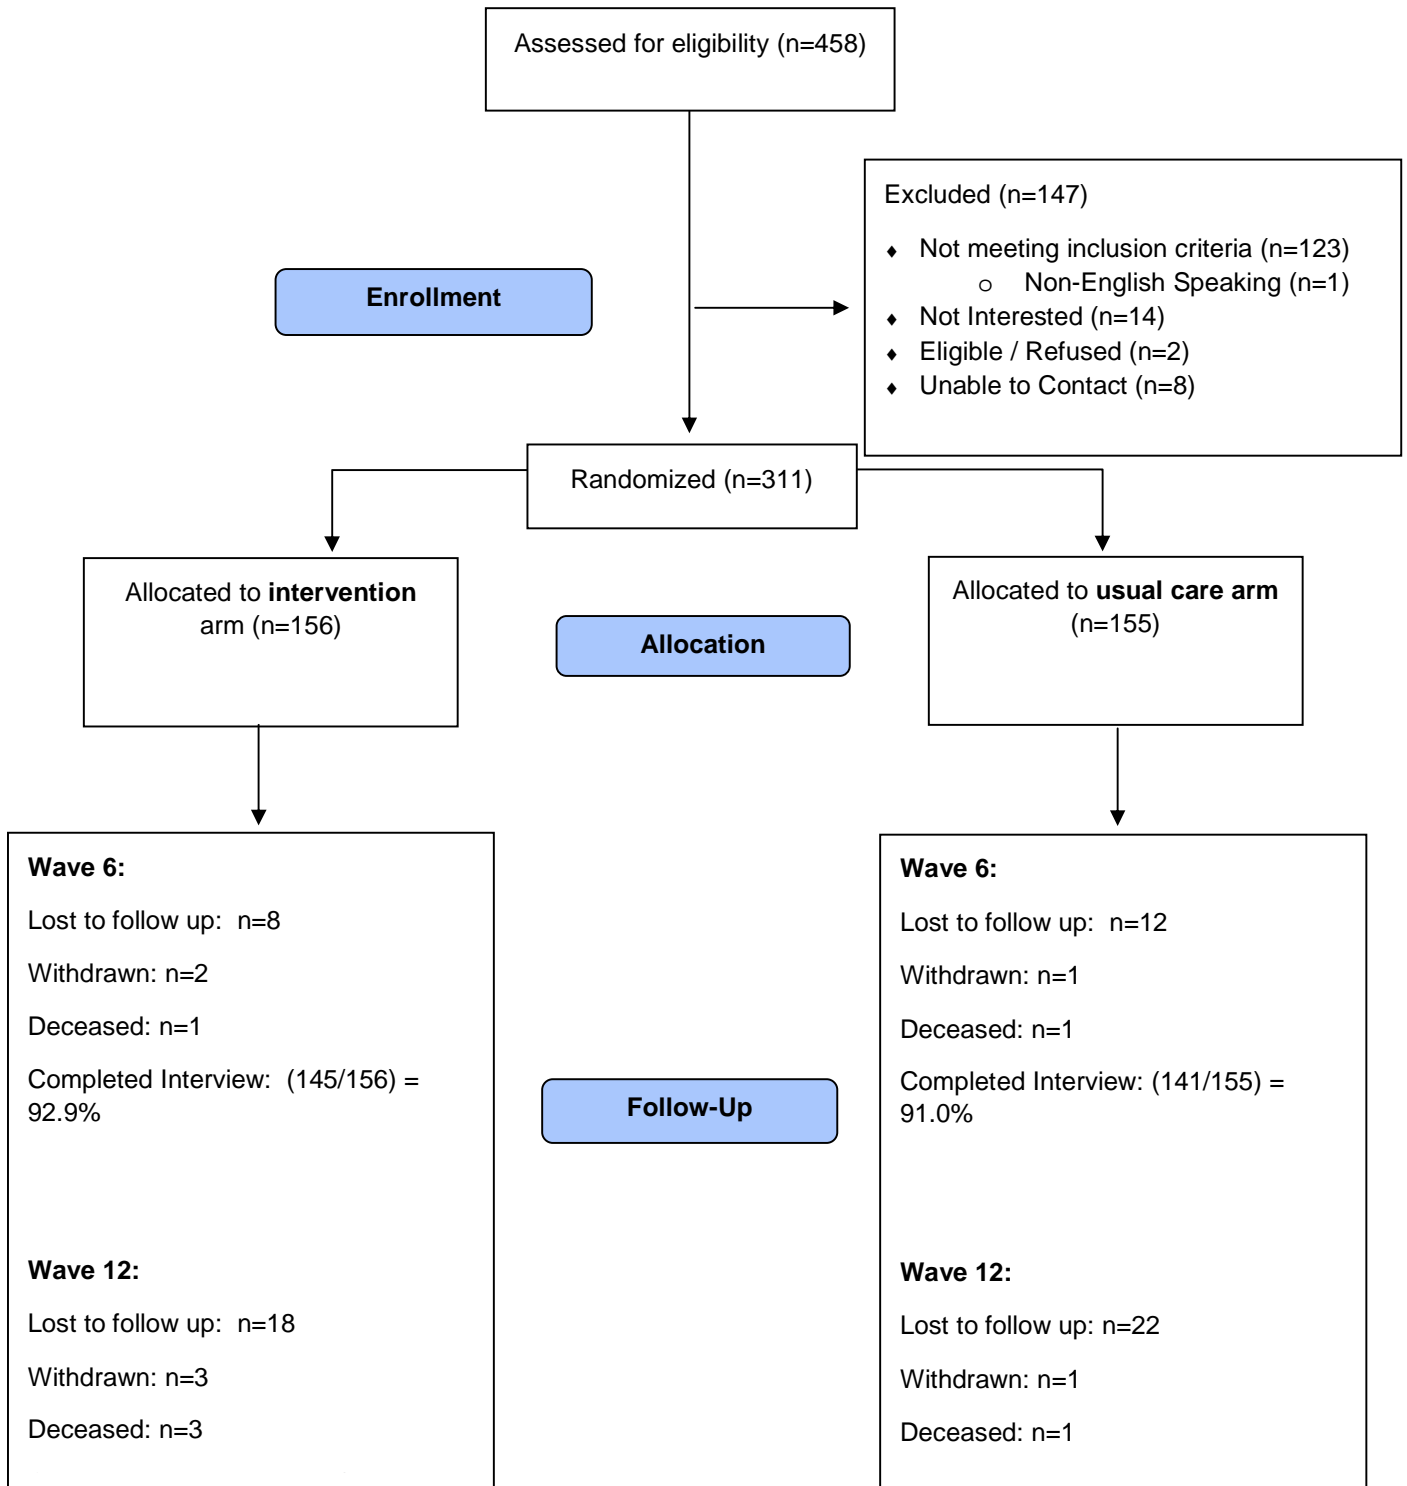

## mPHR Screenshot

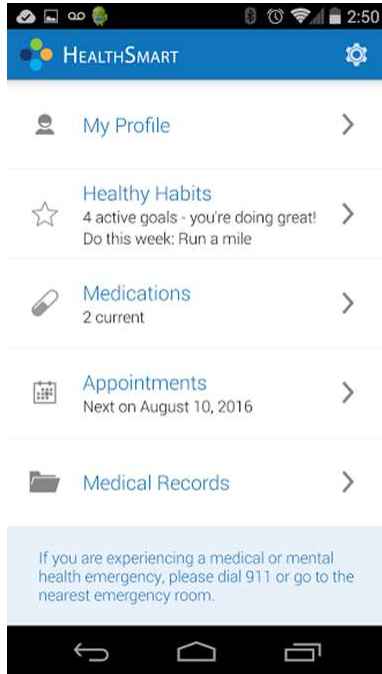

**Supplement Table 1: List of Quality Measures**

| <b>Type of Indicator</b> | <b>Indicator</b>                                                                                                            | <b>Eligible Population</b>                                        |
|--------------------------|-----------------------------------------------------------------------------------------------------------------------------|-------------------------------------------------------------------|
| Prevention quality (1)   | BP Screening                                                                                                                | Adults >=18                                                       |
|                          | Cholesterol Screening                                                                                                       | All adults                                                        |
|                          | Colorectal Cancer Screening                                                                                                 | Adults 50-75                                                      |
|                          | Diabetes screening                                                                                                          | Adults with BP>135/80                                             |
|                          | HIV Screening                                                                                                               | Adults >=18                                                       |
|                          | Obesity screening                                                                                                           | Adults >18                                                        |
|                          | Tobacco use and counselling                                                                                                 | Adults >=18                                                       |
|                          | STI Counseling                                                                                                              | Adults >=18                                                       |
|                          | Mammogram                                                                                                                   | Females >=40                                                      |
|                          | Pap smear                                                                                                                   | Females >=21                                                      |
| Diabetes quality (2)     | Chlamydia                                                                                                                   | Females <24                                                       |
|                          | Diabetes diagnosis in chart or problem list                                                                                 | Adults with FBS>126 or postprandial BS >200                       |
|                          | Eye and visual exam; cholesterol and HDL cholesterol tests; urine protein; foot examination; blood pressure; hemoglobin A1C | Adults with a diagnosis of diabetes                               |
|                          | Dietary and exercise counseling                                                                                             | Adults with a diagnosis of diabetes                               |
|                          | Oral hypoglycemic or insulin therapy                                                                                        | Adults with a diagnosis of diabetes                               |
|                          | ACE inhibitor or a calcium channel blocker                                                                                  | Adults with a diagnosis of diabetes and hypertension              |
|                          | Follow up visit for diabetes                                                                                                | Adults with a diagnosis of diabetes                               |
| Hypertension quality(2)  | Diagnosis of hypertension documented in the chart or problem list                                                           | Adults with blood pressures of >140 systolic and/or >90 diastolic |
|                          | At least 3 BP measurements on different days with a mean SBP>140 and/or a mean DBP>90.                                      | Adults with a new diagnosis of stage 1-3 hypertension             |
|                          | Assessment for risk factors (e.g. medications) that may cause hypertension.                                                 | Adults with a diagnosis of stage 1-3 hypertension                 |
|                          | Urinalysis; glucose; serum creatinine; serum triglycerides                                                                  | Adults with a diagnosis of stage 1-3 hypertension                 |
|                          | Counseling for at least 1 of the following interventions                                                                    | Adults with a diagnosis of stage 1-3 hypertension                 |

|                           |                                                                                                                                                                 |                                                                                            |
|---------------------------|-----------------------------------------------------------------------------------------------------------------------------------------------------------------|--------------------------------------------------------------------------------------------|
|                           | <ul style="list-style-type: none"> <li>a. Weight reduction if obese</li> <li>b. Increased physical activity if sedentary</li> <li>c. Low sodium diet</li> </ul> |                                                                                            |
|                           | Pharmacotherapy: ACE inhibitor, a calcium channel blocker, or a thiazide diuretic.                                                                              | Adults with a diagnosis of stage 1-3 hypertension                                          |
|                           | At least one annual visit for hypertension                                                                                                                      | Adults with a diagnosis of stage 1-3 hypertension                                          |
|                           | Change in dose or regimen of anti-hypertensives or Repeated education regarding lifestyle modifications                                                         | Adults with hypertension with consistent average SBP>160 or DBP>90                         |
| Hyperlipidemia Quality(2) | Documented cholesterol level.                                                                                                                                   | Men <age 70 with preexisting heart disease                                                 |
|                           | Documented LDL cholesterol                                                                                                                                      | Men < age 70 with preexisting heart disease                                                |
|                           | Documented measurements of cholesterol (total or LDL)                                                                                                           | Adults on pharmacological treatment for hyperlipidemia                                     |
|                           | Pharmacological therapy for hyperlipidemia                                                                                                                      | Men < age 70 with preexisting coronary disease who have an LDL cholesterol level >130mg/dl |

**Supplement Table 2: App Usage Categories**

| Category | Average Times Per Week<br>Mean (STD, Min, Max) | <1 time<br>per week % | 1-2 times<br>per week % | 3-4 times<br>per week % | 5+ times<br>per week % |
|----------|------------------------------------------------|-----------------------|-------------------------|-------------------------|------------------------|
| ADD      | 0.13 (0.39, 0.00, 4.16)                        | 96.8                  | 2.6                     | 0.6                     | -                      |
| DELETE   | 0.01 (0.03, 0.00, 0.20)                        | 100.0                 | -                       | -                       | -                      |
| EDIT     | 0.12 (0.20, 0.00, 2.00)                        | 96.2                  | 3.8                     | -                       | -                      |
| VIEW     | 1.58 (1.53, 0.00, 5.60)                        | 32.1                  | 54.5                    | 9.0                     | 4.5                    |

**Supplement Table 3: Moderator Analyses**

| <b>Moderator Variable</b>     | <b>F</b> | <b>Numerator df</b> | <b>Denominator df</b> | <b>P value for moderator*group*time parameter</b> |
|-------------------------------|----------|---------------------|-----------------------|---------------------------------------------------|
| Clinic Site                   | 0.30     | 3                   | 614                   | 0.83                                              |
| >2 CVD conditions             | 0.05     | 3                   | 614                   | 0.99                                              |
| Baseline smartphone ownership | 0.63     | 3                   | 614                   | 0.60                                              |

## References

1. US Preventive Services Task Force: Guide to Clinical Preventive Services, 2012: Recommendations of the US Preventive Services Task Force, Agency for Healthcare Research and Quality; 2012.
2. McGlynn EA, Asch SM, Adams J, Keesey J, Hicks J, DeCristofaro A, Kerr EA. The quality of health care delivered to adults in the United States. *N Engl J Med.* 2003;348:2635-2645.
